# Supplementary material for: The psychosocial impact of endometriosis on South Indian women: a qualitative study
Source: Research Square preprint supplement (doi:10.21203/rs.3.rs-7387184/v1), 2025-09-02
Supplement: Supplementary file 1 [file 40cc2aac3379bbe282de043a.docx]

**Supplementary Material 1. Differences between protocol and study**

(preregistration-ID: 10.17605/[OSF.IO/G4N3U](http://osf.io/G4N3U))

The final study closely adhered to the preregistered protocol but included a few minor deviations. Although we initially planned to conduct all interviews in English, we expanded this to include Tamil-speaking participants after clinic staff agreed to provide real-time translation. This adjustment improved inclusivity and enabled participation from women who would otherwise have been excluded due to language barriers.

While the preregistered aims focused specifically on the psychological impact of endometriosis and sociocultural influences on healthcare and social decision-making, the final study took a broader psychosocial approach. This included exploring additional domains such as the negotiation of modern gender roles, the impact on intimate relationships, and changing generational attitudes toward menstruation and fertility. These extensions emerged naturally during interviews and were retained due to their relevance to participants’ lived experiences.

All other aspects of study design and analysis, including recruitment, sampling strategy, data collection methods, and thematic analysis, remained consistent with the original protocol.

**Supplementary Material 2. Interview guide (indicative questions)**

Participants were asked open-ended questions under four broad domains. The following is a sample of indicative prompts used to guide discussion:

#### 1. Experiences of living with endometriosis

- Can you walk me through your journey with endometriosis, beginning with your first symptoms?
- What has it been like living with these symptoms day to day?

2. Physical, social, and emotional Impacts

- How has this condition affected different parts of your life; physically, socially, or emotionally?
- In what ways have you had to adjust because of your symptoms?

#### 3. Sources of support and unmet needs

- Who have you turned to for support, and what has that been like?
- Are there any kinds of help or understanding you feel have been missing?

#### 4. Future outlook

- How has this condition influenced your thoughts or feelings about the future?
- In what ways has it affected your views or decisions around family or personal goals?
